# Supplementary material for: A Melanin-Related Phenolic Polymer with Potent Photoprotective and Antioxidant Activities for Dermo-Cosmetic Applications
Source: Antioxidants (Basel). 2020 Mar 25;9(4):270. doi: 10.3390/antiox9040270 (PMC7222206; doi:10.3390/antiox9040270)
Supplement: Supplementary file 1 [file antioxidants-09-00270-s001.pdf]

## Supplementary Materials

# A Melanin-Related Phenolic Polymer with Potent Photoprotective and Antioxidant Activities for Dermo-Cosmetic Applications

Davide Liberti, Maria Laura Alfieri, Daria Maria Monti,\* Lucia Panzella \* and Alessandra Napolitano

Department of Chemical Sciences, University of Naples "Federico II", Via Cintia 4, I-80126 Naples, Italy;  
[davide.liberti@unina.it](mailto:davide.liberti@unina.it) (D.L.); [marialaura.alfieri@unina.it](mailto:marialaura.alfieri@unina.it) (M.L.A.); [alesnapo@unina.it](mailto:alesnapo@unina.it) (A.N.)

\* Correspondence: [mdmonti@unina.it](mailto:mdmonti@unina.it) (D.M.M.); [panzella@unina.it](mailto:panzella@unina.it) (L.P.); Tel.: +39-081-679150 (D.M.M.); +39-081-674131 (L.P.)

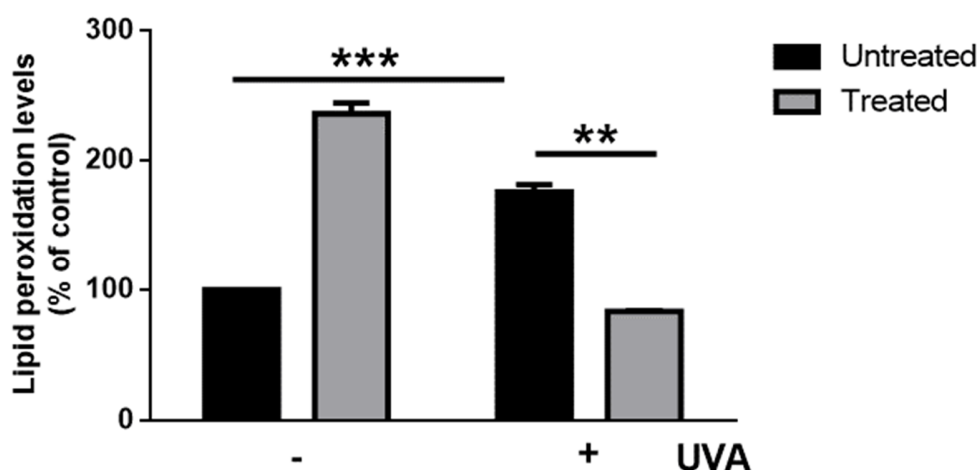

**Figure S1.** Lipid peroxidation levels evaluated by TBARS assay. Cells were pre-incubated with MeDHICA-melanin (10  $\mu\text{g/mL}$ ) for 2 h before UVA irradiation and then incubated for 90 min. Values are expressed as % with respect to control (*i.e.* untreated) cells. Data shown are means  $\pm$  SD of three independent experiment. \*\* indicates  $p < 0.005$ , \*\*\* indicates  $p < 0.0005$ . Black bars refer to control cells and grey bars to cells incubated with MeDHICA-melanin. (-) indicates non irradiated cells; (+) indicates cells exposed to UVA irradiation.
